# Supplementary material for: VTC4 Polyphosphate Polymerase Knockout Increases Stress Resistance of Saccharomyces cerevisiae Cells
Source: MDPI journal article supplement (doi:10.3390/biology10060487), 2021-05-30
Supplement: s1 [file s1]

**Supplemental Table S1.** *S. cerevisiae* gene-specific primers used in quantitative real-time qPCR experiment.

| Gene Standard Name | Gene Systematic Name | Gene Brief description                                  | Primer  | Oligonucleotide sequence (5' > 3') |
|--------------------|----------------------|---------------------------------------------------------|---------|------------------------------------|
| ALG9               | YNL219C              | Mannosyltransferase, involved in N-linked glycosylation | Alg9_F  | TAC CGG TAA AGA GTG GCC GA         |
|                    |                      |                                                         | Alg9_R  | TGC AGC ACA TGC CAG CTT AT         |
| DDR2               | YOL052C-A            | Multi-stress response protein                           | Ddr2_F  | AAA AAG GCC AAA GCA CCA CC         |
|                    |                      |                                                         | Ddr2_R  | AAA ACG CAT CCA ACA CCA CG         |
| PHM7               | YOL084W              | Protein of unknown function                             | Phm7_F  | TCT TTT GGG CTT TCC CCG TT         |
|                    |                      |                                                         | Phm7_R  | GAC ACC CAT CAG GAA GGT GG         |
| PHO5               | YBR093C              | Repressible acid phosphatase                            | Pho5_F  | TCA ACA TCA CCT TGC AGA CTG T      |
|                    |                      |                                                         | Pho5_R  | TCG TAG TCC CAA GCA GGA CA         |
| PHO84              | YML123C              | High-affinity inorganic phosphate (Pi) transporter      | Pho84_F | ACG CAA ACT CTG GTG CTG AA         |
|                    |                      |                                                         | Pho84_R | CCA AAA TGC AGT CGA TGC GG         |
